# Supplementary material for: Spermidine restricts neonatal inflammation via metabolic shaping of polymorphonuclear myeloid-derived suppressor cells
Source: JCI journal article supplement (doi:10.1172/jci183559), 2025-03-31
Supplement: sd1 [file 1]

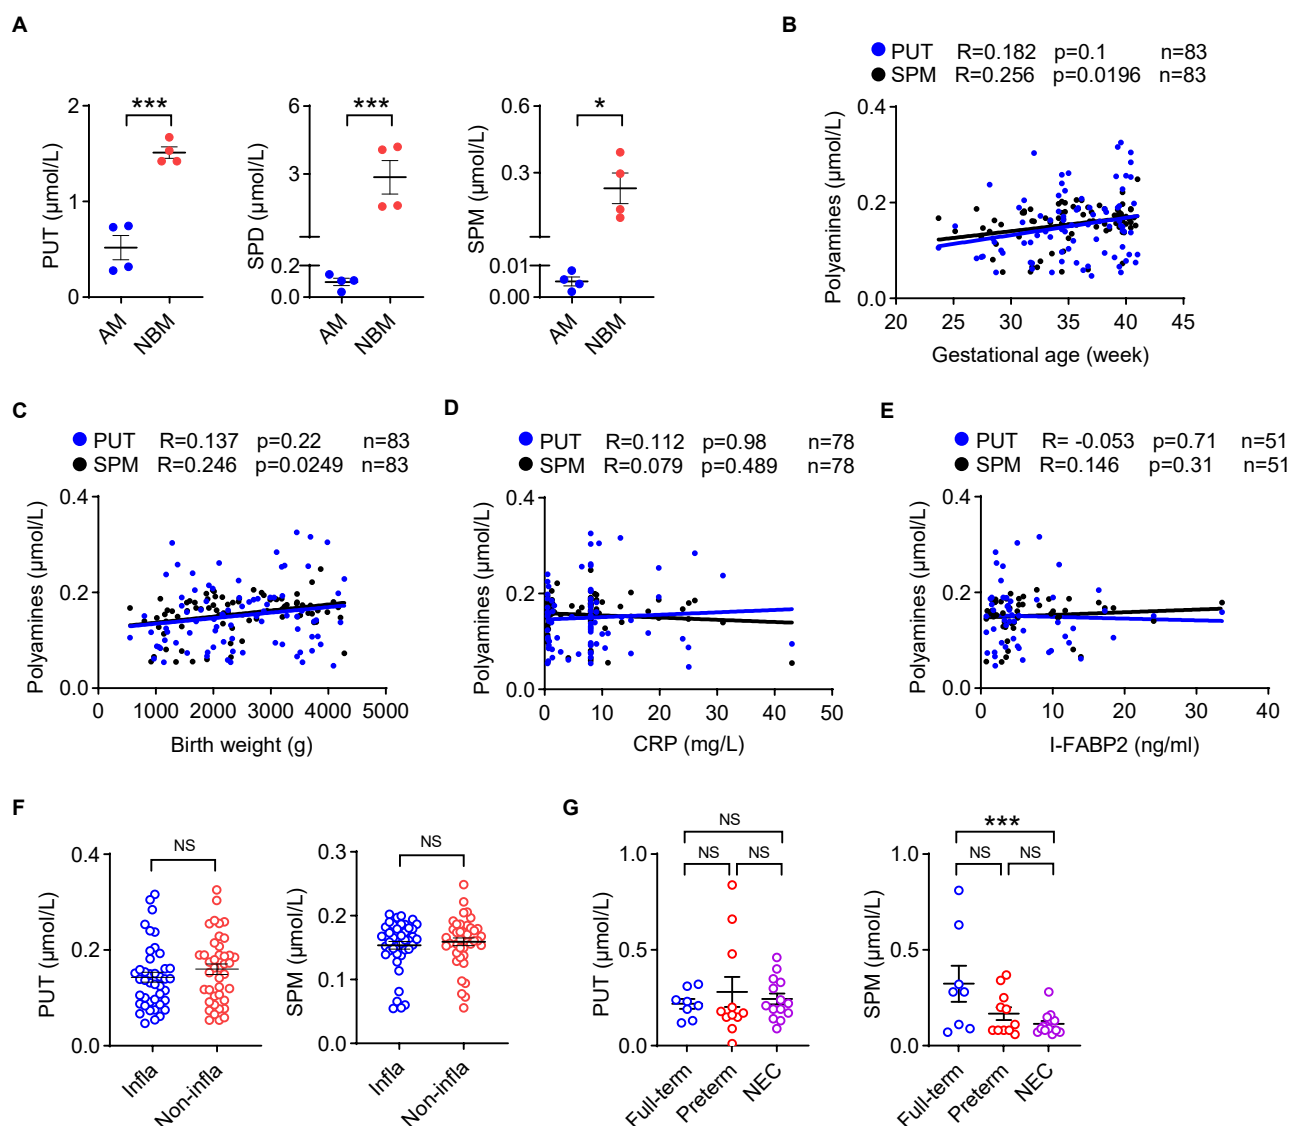

**Supplemental Figure 1. Plasma spermidine is correlated with a reduced risk of inflammation in human newborns.** (A) Plasma polyamines in adult mice (AM) and newborn mice (NBM) were detected by UPLC-MS/MS ( $n=4$  per group). (B-E) Correlation between polyamines and gestational age (B), birth weight (C), C-Reactive Protein (CRP) (D), and I-FABP2 (E). Clinical parameters were listed in Supplemental Table 2. PUT, putrescine; SPM, spermine. (F) Plasma samples were collected from healthy neonates within 2 days of birth. The infants were divided into two groups based on the presence of subsequent inflammatory disorders within one month of follow-up: the inflammation group and non-inflammation group. PUT and SPM concentration in inflammation (Infia) ( $n=42$ ) and non-inflammation (Non-infia) group ( $n=41$ ). Clinical parameters were listed in Supplemental Table 2. (G) PUT and SPM concentration in healthy full-term babies ( $n=8$ ), preterm babies ( $n=11$ ) and necrotizing enterocolitis (NEC) patients ( $n=14$ ). Clinical parameters were listed in Supplemental Table 1. Data were shown as mean  $\pm$  SEM. Statistical analysis was performed using unpaired two-tailed Student's  $t$  test (A and F), Spearman's correlation coefficient (B to E) and one-way ANOVA with Tukey's multiple comparison test (G). NS, not significant,  $p > 0.05$ ; \* $p < 0.05$ , \*\* $p < 0.01$ , \*\*\* $p < 0.001$ .

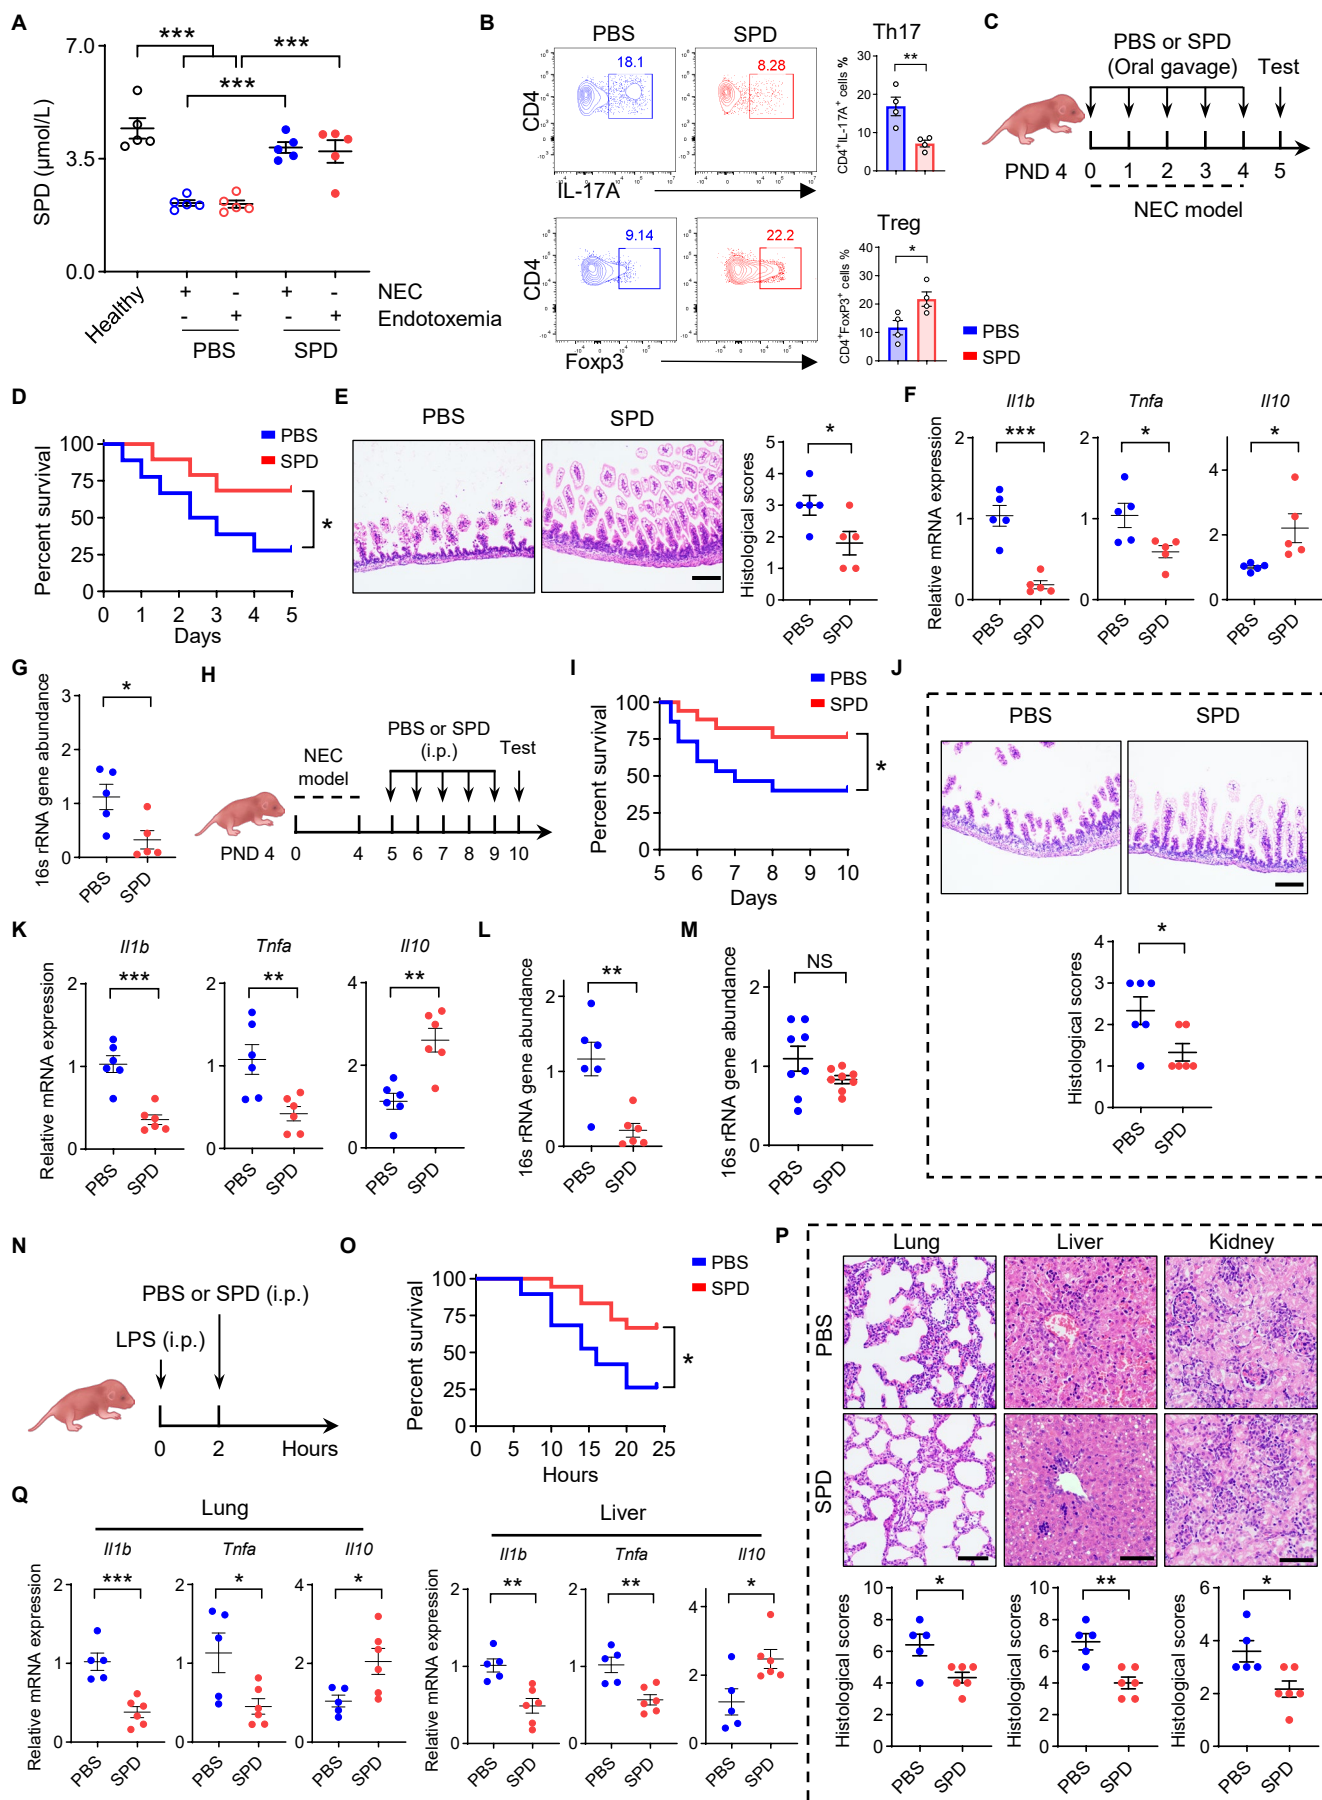

**Supplemental Figure 2. Spermidine attenuates neonatal inflammation.** (A) Plasma sample were collected from healthy, NEC and endotoxemia mouse with or without SPD treatment. SPD was detected by ELISA (n=5 per group). (B) The proportions of Th17 and Treg in small intestine were detected by flow cytometry after NEC induction (n=4 per group). Data are representative of 3 independent experiments. (C-G) Schematic approach for oral gavage of SPD (10 mg/kg/day) during induction of NEC (C) (PBS, n=18; SPD, n=19). The survival curve of mice (D). Data combined from 2 independent experiments. H&E staining and histopathological scores of intestinal tissues (E) (n=5 per group). Relative mRNA expression of *Il1b*, *Tnfa* and *Il10* were determined by qRT-PCR (F) (n=5 per group). Bacterial abundance in the intestinal wall was evaluated by 16s abundance (G) (n=5 per group). (H-L) Schematic approach for treatment with SPD after induction of NEC (H) (PBS, n=15; SPD, n=17). The survival curve of mice (I). Data combined from 2 independent experiments. H&E staining and histopathological scores of intestinal tissues (J) (n=6 per group). Relative mRNA expression of *Il1b*, *Tnfa* and *Il10* were determined by qRT-PCR (K) (n=6 per group). Bacterial abundance in the intestinal wall was evaluated by 16s abundance (L) (n=6 per group). (M) Healthy mice were treated with SPD (10 mg/kg/day, i.p.) for consecutive five days and bacterial abundance in intestine was evaluated by 16s abundance (n=8 per group). (N-Q) Schematic approach for treatment with SPD after induction of neonatal endotoxemia (N) (PBS, n=19; SPD, n=18). The survival curve of mice (O). Data combined from 2 independent experiments. H&E staining and histopathological scores of lung, liver and kidney (P) (PBS, n=5; SPD, n=6). Relative mRNA expression of *Il1b*, *Tnfa* and *Il10* were determined by qRT-PCR (Q) (PBS, n=5; SPD, n=6). Data were shown as mean  $\pm$  SEM. Statistical analysis was performed using unpaired two-tailed Student's t test (B, E-G, J-M, P and Q), two-way ANOVA with Sidak's multiple comparison test (A) and log-rank (Mantel-Cox) test (D, I and O). Scale bar indicates 100  $\mu$ m. NS, not significant,  $p > 0.05$ ; \* $p < 0.05$ , \*\* $p < 0.01$ , \*\*\* $p < 0.001$ .

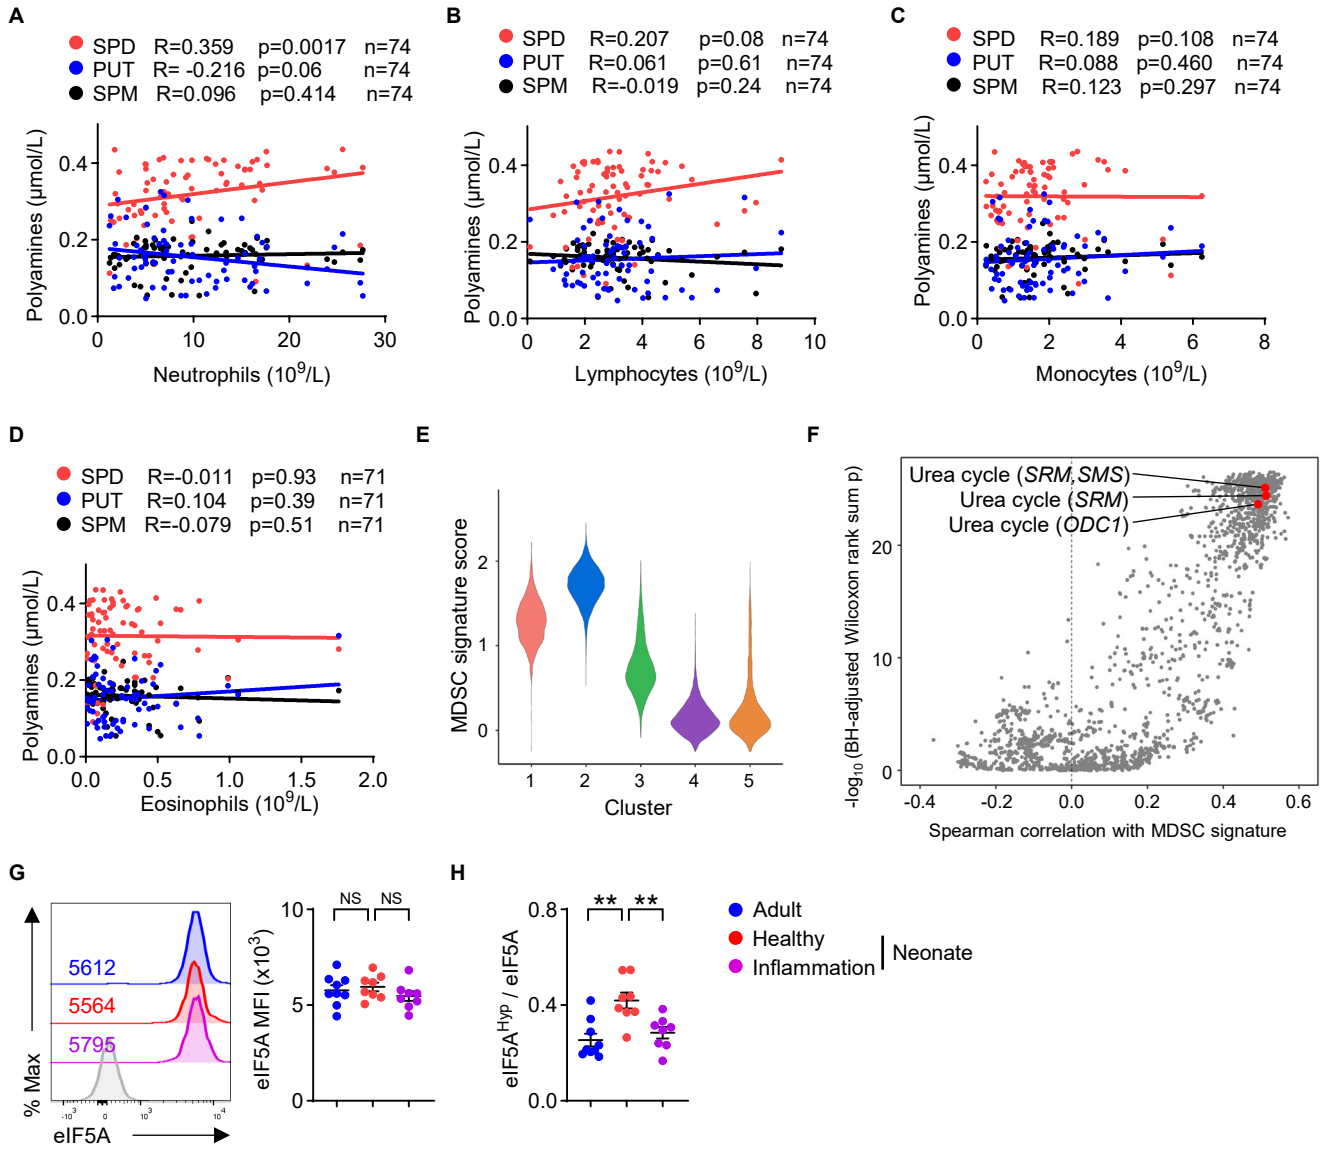

**Supplemental Figure 3. Polyamine metabolism is enriched in neonatal myeloid cells.** (A-D) Correlation between polyamines and absolute counts of neutrophils (A), lymphocytes (B), monocytes (C) and eosinophils (D). Clinical parameters were listed in Supplemental Table 2. (E and F) MDSC signature score of neutrophil subclusters in single-cell RNA sequencing dataset (GSE253963) (E). Correlation between polyamine metabolism reaction and MDSC signature (F). (G and H) The expression of eIF5A (G) and eIF5A<sup>Hyp</sup>/eIF5A (H) in neutrophils from healthy adults, and PMN-MDSCs from healthy and inflammatory neonates were detected by flow cytometry. Clinical parameters were listed in Supplemental Table 1. Data were shown as mean  $\pm$  SEM. Statistical analysis was performed using Spearman's correlation coefficient (A-D) and one-way ANOVA with Tukey's multiple comparison test (G and H). NS, not significant,  $p > 0.05$ ; \* $p < 0.05$ , \*\* $p < 0.01$ , \*\*\* $p < 0.001$ .

Mouse

**A**

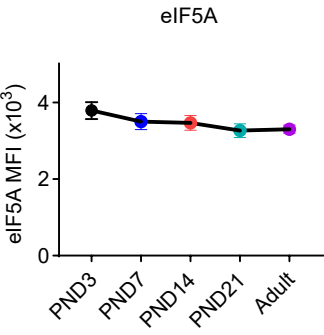

**B**

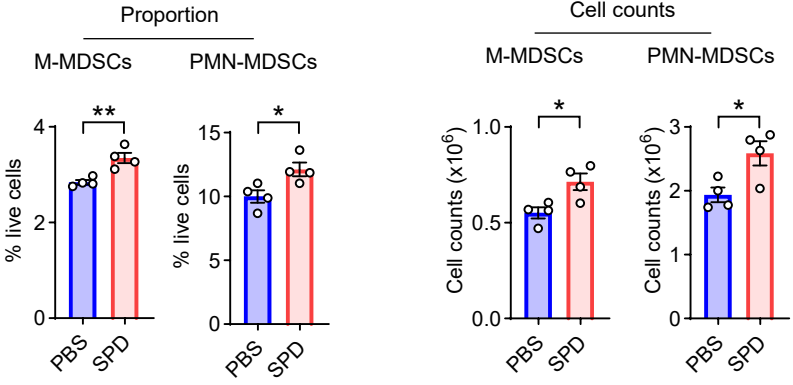

**C**

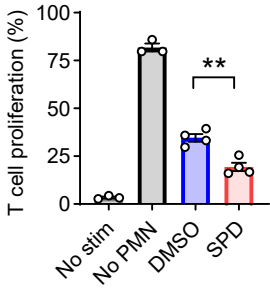

**D**

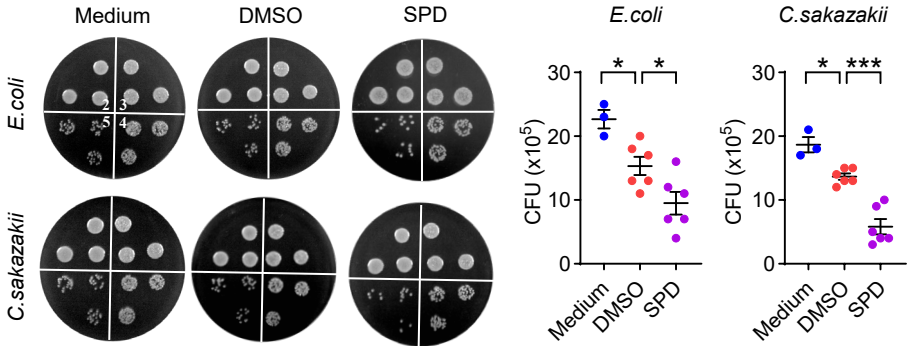

**E**

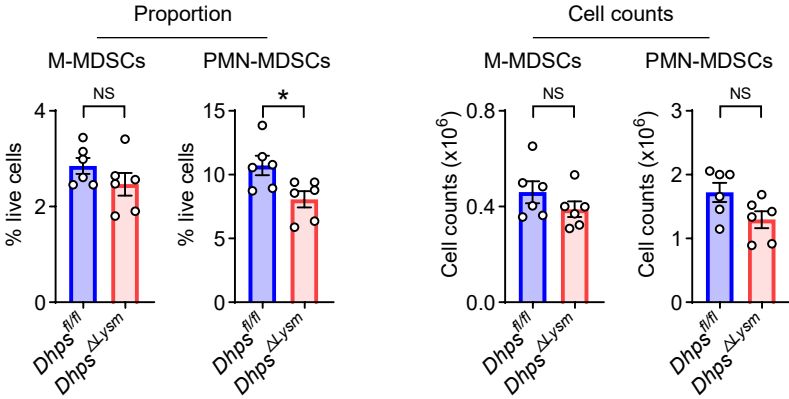

Human

**F**

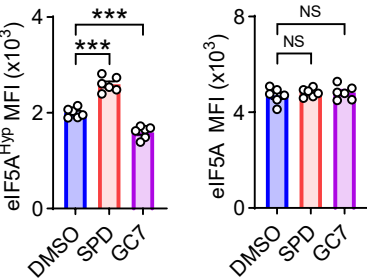

**G**

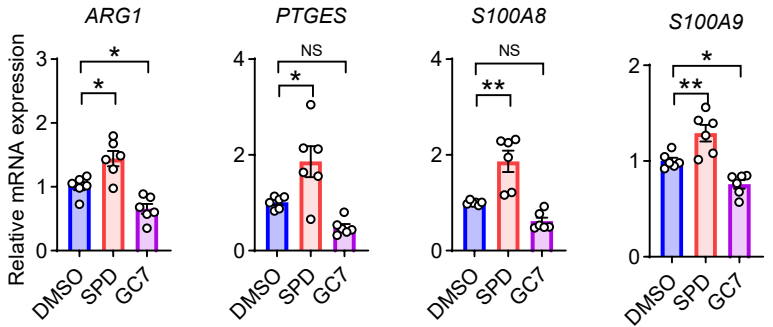

**Supplemental Figure 4. Polyamine-eIF5A<sup>Hyp</sup> enhances the immunosuppressive activity of PMN-MDSCs in neonates.** (A) The expression of eIF5A in CD11b<sup>+</sup>Ly6C<sup>low</sup>Ly6G<sup>+</sup> cells of different ages (n=4 per group). (B and C) 4-day-old mice were treated with SPD (10 mg/kg/day, i.p.) for five days. The proportion and absolute counts of splenic M-MDSCs and PMN-MDSCs were detected by flow cytometry (B) (n=4). Suppression of T cell proliferation by PMN-MDSCs (C) (n=4 per group). Data are representative of 3 independent experiments. (D) Spermidine-treated PMN-MDSCs and control PMN-MDSCs were incubated with *Escherichia coli* (*E. coli*) or *Cronobacter sakazakii* (*C. sakazakii*). Anti-bacterial activity was evaluated by calculating the colony-forming unit (CFU). Medium group was used as negative control, which was incubated without PMN-MDSCs. (Medium, n=3; DMSO, n=6; SPD, n=6). (E) The proportion and absolute counts of splenic M-MDSCs and PMN-MDSCs from *Dhps*<sup>fl/fl</sup> and *Dhps*<sup>ΔLysm</sup> littermates (n=6 per group). Data are representative of 3 independent experiments. (F and G) Human neonatal PMN-MDSCs were isolated from peripheral blood of healthy term babies. PMN-MDSCs were treated with SPD (0.2 μM) and GC7 (10 μM) for 16 hours. The expression of eIF5A<sup>Hyp</sup> and eIF5A were detected by flow cytometry (F) (n=6 per group). Relative mRNA expression of genes involved in immunosuppressive function were detected using qRT-PCR (G) (n=6 per group). Clinical parameters were listed in Supplemental Table 1. Data were shown as mean ± SEM. Statistical analysis was performed using unpaired two-tailed Student's t test (B and E) and one-way ANOVA with Tukey's multiple comparison test (C, D, F and G). NS, not significant, p > 0.05; \*p < 0.05, \*\*p < 0.01, \*\*\*p < 0.001.

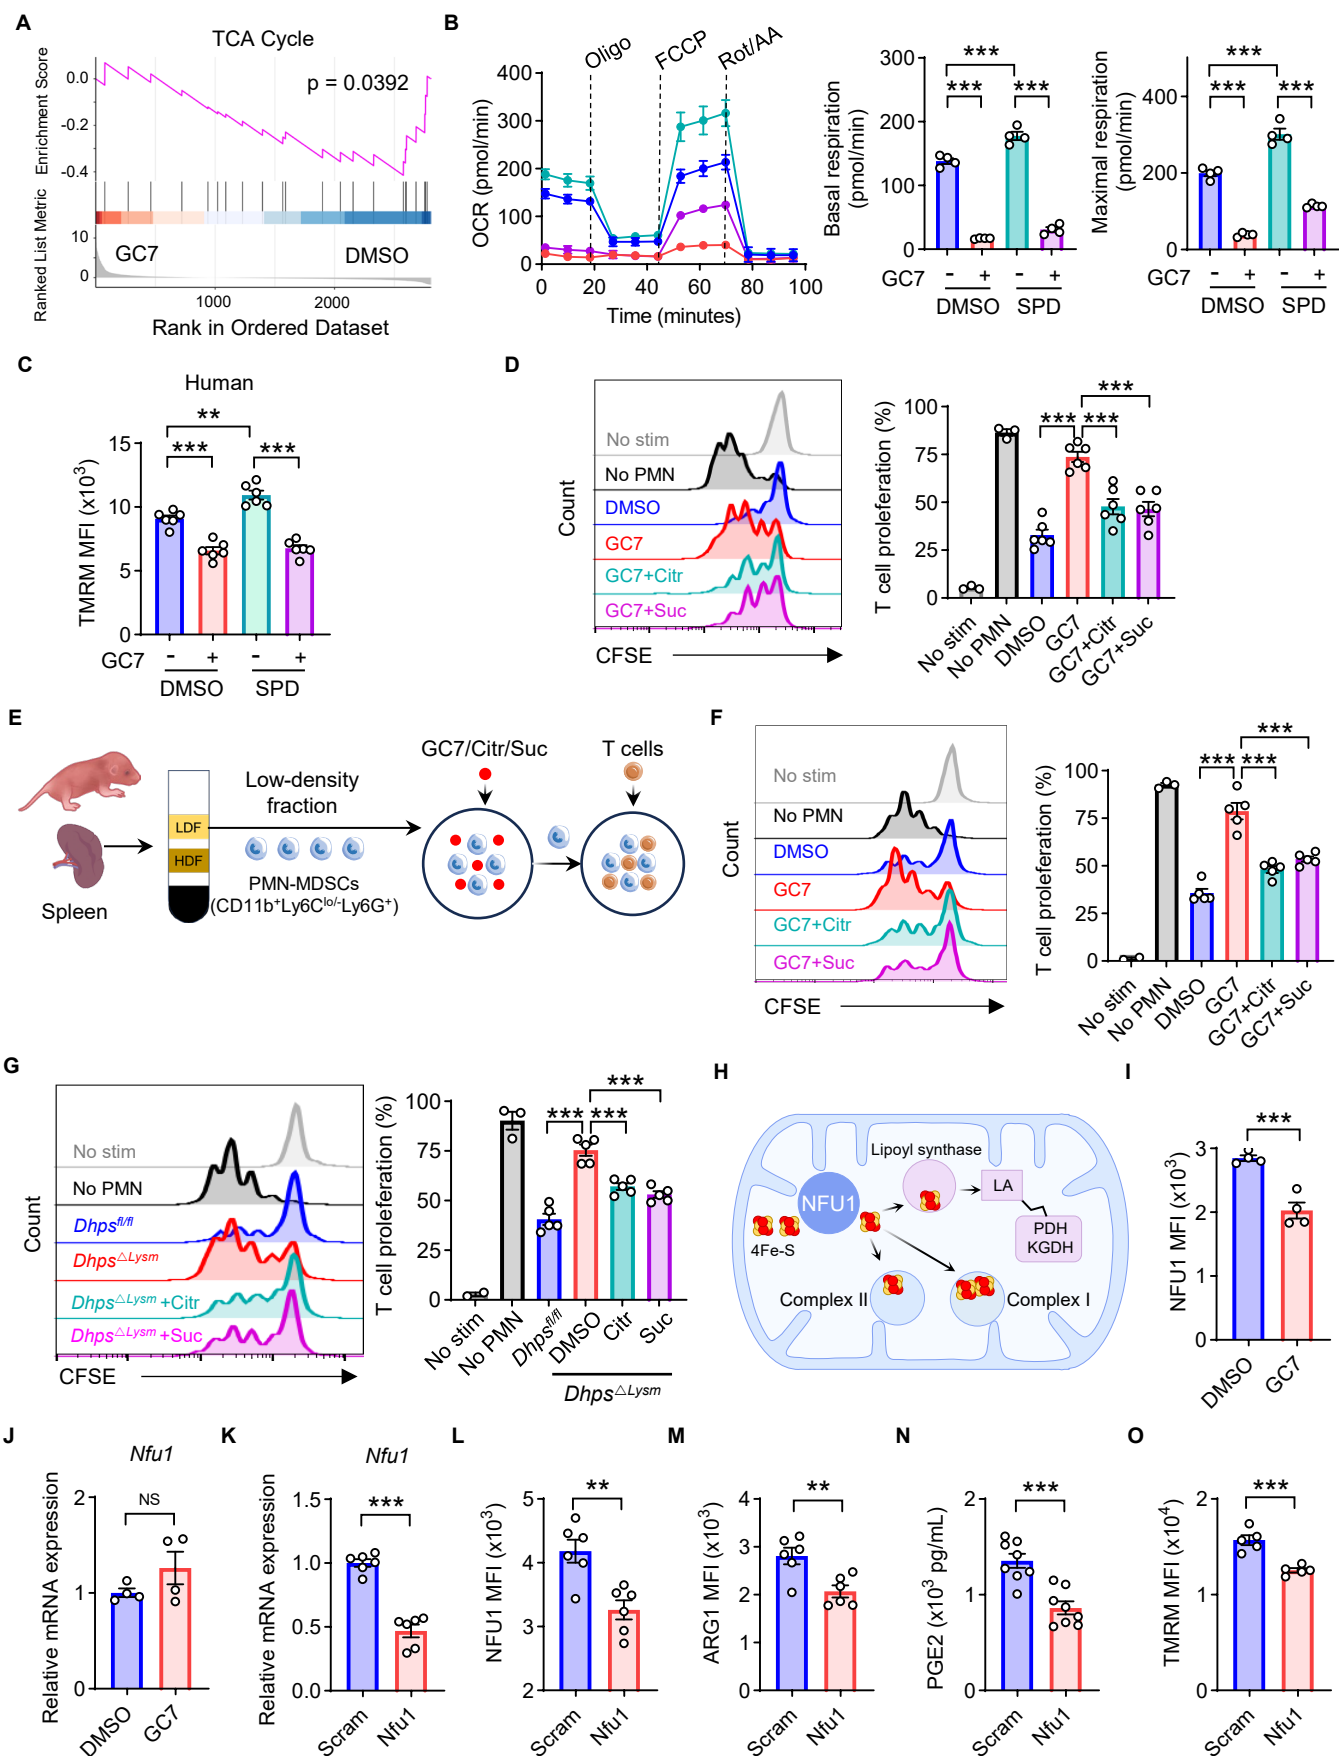

**Supplemental Figure 5. eIF5A<sup>Hyp</sup> maintains the mitochondrial function of neonatal PMN-MDSCs by modulating the translation of NFU1.** (A) GSEA based on proteomics analysis. (B) Oxygen consumption rates (OCR) of PMN-MDSCs treated with SPD (0.2  $\mu$ M), GC7 (10  $\mu$ M) and SPD+GC7, was evaluated by seahorse assay (n=4 per group). (C) Human neonatal PMN-MDSCs were isolated from peripheral blood of healthy term babies. TMRM was detected after treatment with SPD (0.2  $\mu$ M), GC7 (10  $\mu$ M) for 16 hours (n=6 per group). Clinical parameters were listed in Supplemental Table 1. (D) Suppression of T cell proliferation by PMN-MDSCs, which were pretreated with GC7 (10  $\mu$ M), GC7+citrate (Citr, 1  $\mu$ M) and GC7+Succinate (Suc, 1  $\mu$ M) (n=6 per group). Data are representative of 3 independent experiments. (E-G) Another strategy for isolating mouse PMN-MDSCs. The single-cell suspension of spleen was subjected to a discontinuous Histopaque (Sigma) gradient (1.077 and 1.119). Low-density fraction (LDF) was collected from the plasma-1.077 interface and PMN-MDSCs were isolated by FACS based on the gating of CD11b<sup>+</sup>Ly6C<sup>low</sup>Ly6G<sup>+</sup> (E). Suppression of T cell proliferation by PMN-MDSCs, which were pretreated with GC7 (10  $\mu$ M), citrate (Citr, 1  $\mu$ M) or succinate (Suc, 1  $\mu$ M) (F). Data are representative of 3 independent experiments. Suppression of T cell proliferation by *Dhps*<sup>fl/fl</sup> and *Dhps* $\Delta$ <sup>Lysm</sup> PMN-MDSCs, which were pretreated with citrate (Citr, 1  $\mu$ M) or succinate (Suc, 1  $\mu$ M) (G). Data are representative of 3 independent experiments. (H) NFU1 delivers [4Fe-4S] iron-sulfur cluster to target proteins and maintains their functions. (LA, lipoic acid; PDH, pyruvate dehydrogenase; KGDH,  $\alpha$ -ketoglutarate dehydrogenase). (I and J) The expression of NFU1 in protein (I) and mRNA (J) level after treatment with GC7 (10  $\mu$ M) (n=4 per group). Data are representative of 3 independent experiments. (K-O) Nfu1 was silenced by Nfu1-shRNA. The expression of Nfu1 was detected by qRT-PCR (K) and flow cytometry (L). ARG1 (M) (n=6 per group) and cellular PGE2 production (N) (n=8 per group) and TMRM (O) (n=5 per group) were detected. Data were shown as mean  $\pm$  SEM. Statistical analysis was performed using one-way ANOVA with Tukey's multiple comparison test (D, F and G), and two-way ANOVA with Sidak's multiple comparison (B and C) and unpaired two-tailed Student's t test (I to O). NS, not significant; p > 0.05; \*p < 0.05, \*\*p < 0.01, \*\*\*p < 0.001.



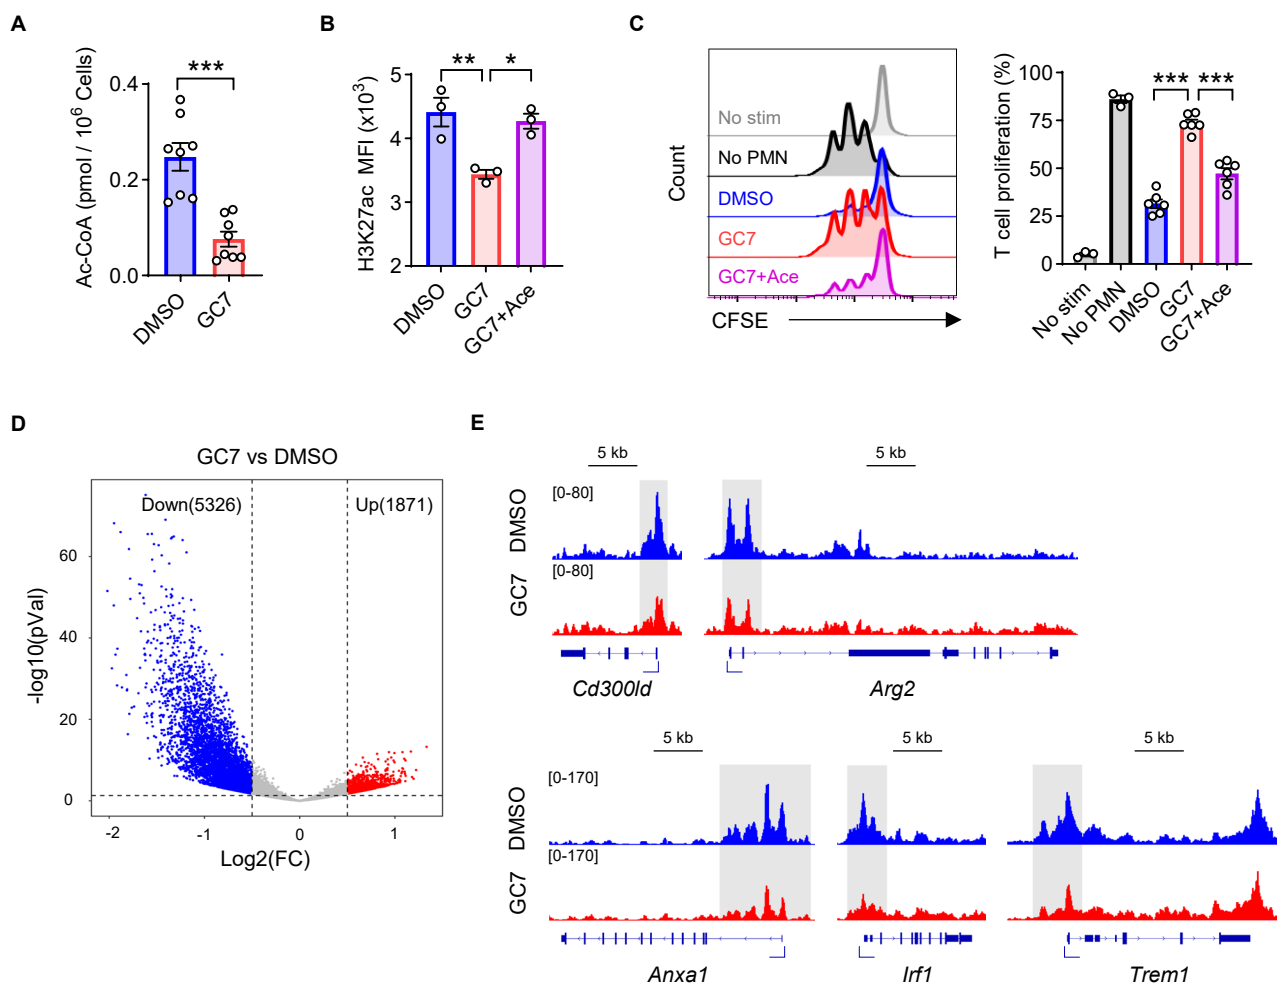

**Supplemental Figure 6. Histone acetylation-mediated epigenetic regulation contributes to the effect of eIF5A<sup>Hyp</sup> on PMN-MDSCs.** (A) Cellular Ac-CoA in PMN-MDSCs were detected after treatment with GC7 (10  $\mu$ M) for 16 hours (n=8 per group). (B and C) PMN-MDSCs were treated with GC7 (10  $\mu$ M) and GC7+acetate (Ace, 1  $\mu$ M). The levels of H3K27ac (B) (n=3 per group) and suppression of T cell proliferation (C) (n=6 per group) were detected after treatment. Data are representative of 3 independent experiments. (D) Volcano plot showing the differentially enriched peaks of H3K27ac. (E) Integrated Genomic Viewer screenshots for H3K27ac coverage at genes associated with immunosuppressive function of MDSCs. Statistical analysis was performed using unpaired two-tailed Student's t test (A) and one-way ANOVA with Tukey's multiple comparison test (B and C). NS, not significant,  $p > 0.05$ ; \* $p < 0.05$ , \*\* $p < 0.01$ , \*\*\* $p < 0.001$ .

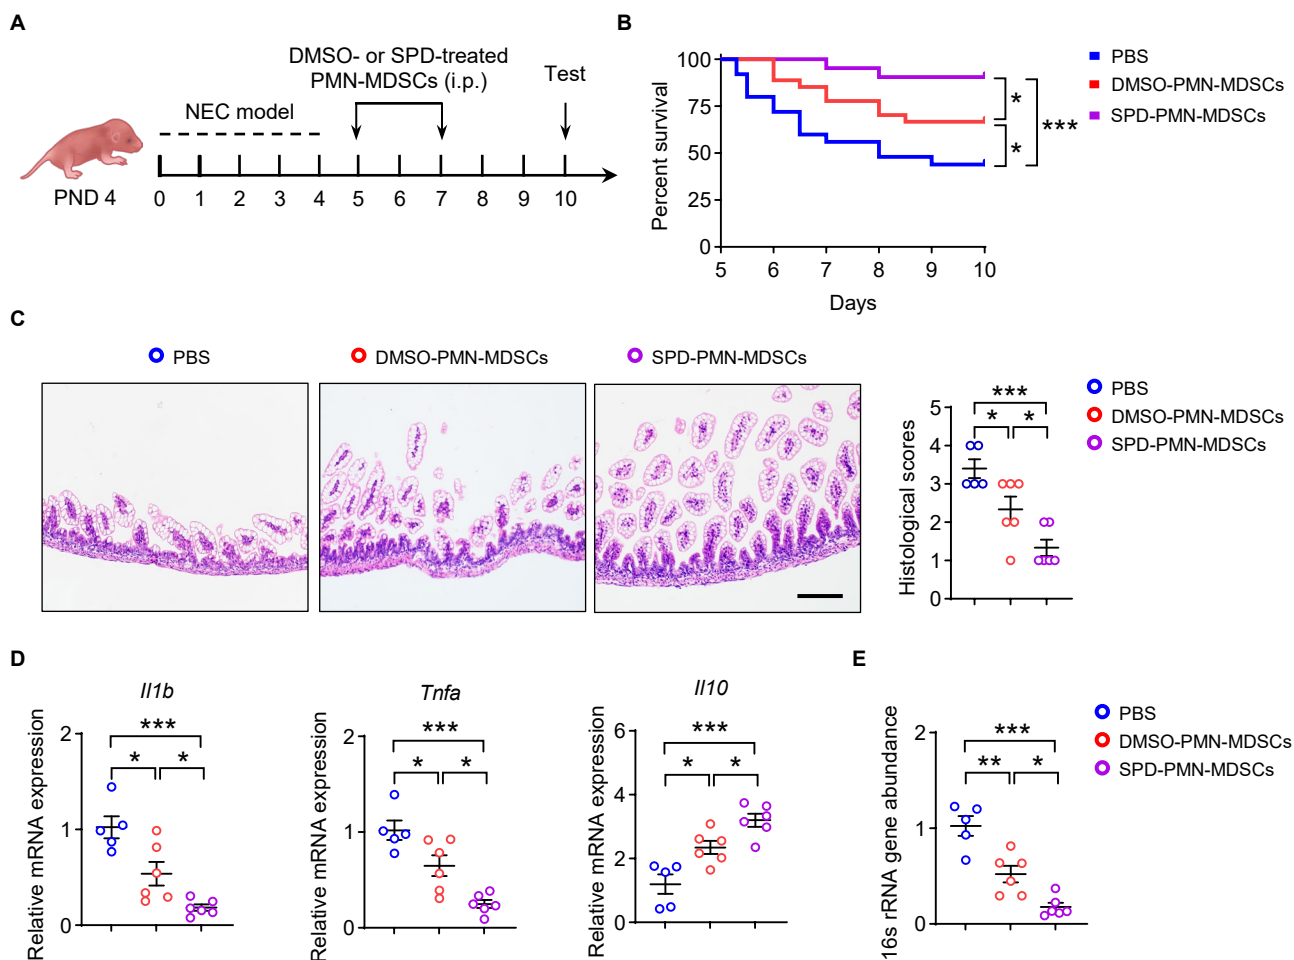

**Supplemental Figure 7. Spermidine attenuates neonatal inflammation through eIF5A<sup>Hyp</sup> in PMN-MDSCs.** (A) Schematic approach for transfer of PMN-MDSCs after NEC induction. (B) The survival curve after induction of NEC (PBS, n=25; DMSO-PMN-MDSCs, n=27; SPD-PMN-MDSCs, n=21). Data combined from 2 independent experiments. (C) H&E staining and histopathological scores of intestine tissues. (D) Relative mRNA expression of *Il1b*, *Tnfa* and *Il10* were determined by qRT-PCR. (E) Bacterial abundance in the intestinal wall was evaluated by 16s abundance. Statistical analysis was performed using log-rank (Mantel-Cox) test (B) and one-way ANOVA with Tukey's multiple comparison test (C to E). Scale bar indicates 100  $\mu$ m. NS, not significant,  $p > 0.05$ ; \* $p < 0.05$ , \*\* $p < 0.01$ , \*\*\* $p < 0.001$ .

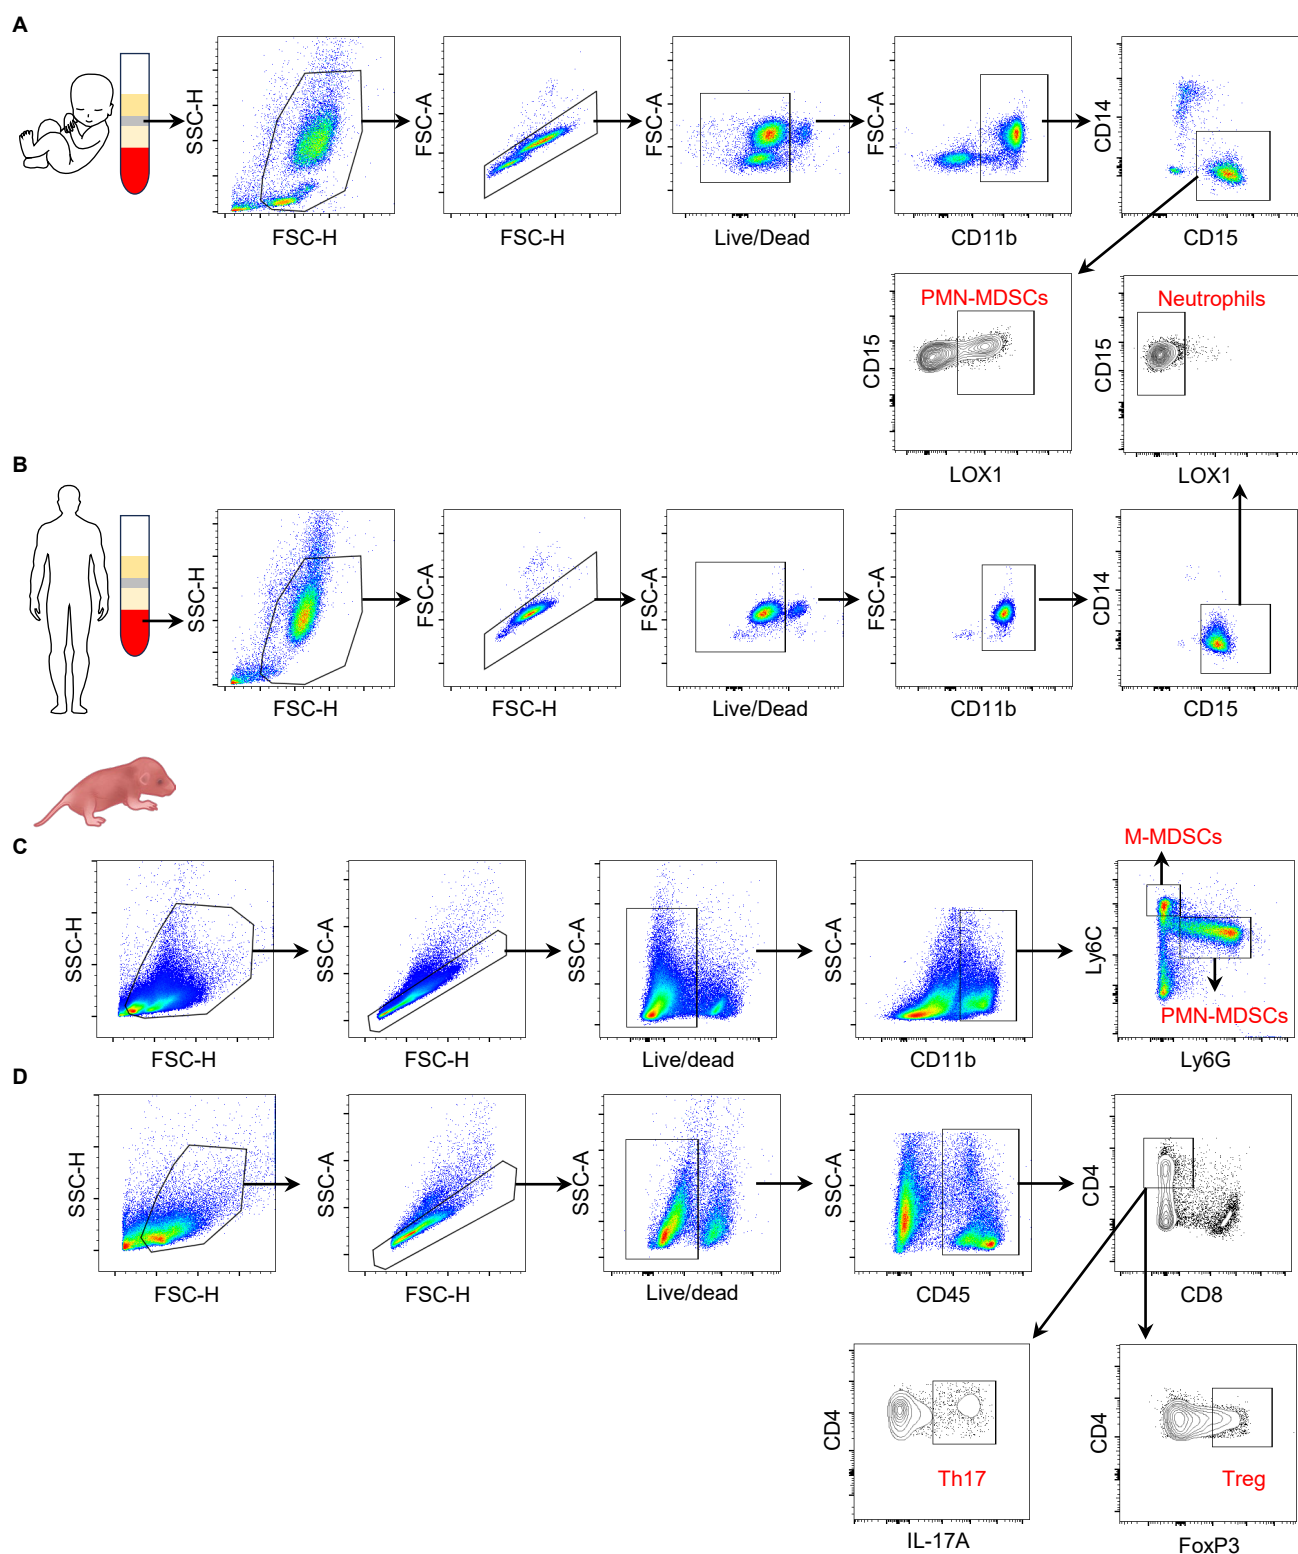

**Supplemental Figure 8. Gating strategies.** (A and B) Strategy for isolating neonatal PMN-MDSCs (CD11b<sup>+</sup>CD14<sup>+</sup>CD15<sup>+</sup>LOX1<sup>+</sup>) and adult neutrophils (CD11b<sup>+</sup>CD14<sup>+</sup>CD15<sup>+</sup>LOX1<sup>+</sup>) from human peripheral blood. Cell fractions were separated by Lymphoprep™. Mononuclear cell fraction (low density) (A) was collected for isolating PMN-MDSCs in neonatal sample and sediment (high density) (B) was collected for isolating neutrophils in adult sample. (C) Gating strategy for splenic immune cells of mice. (D) Gating strategy for intestinal immune cells of mice.

**Supplemental Table 1. Clinical characteristics of Cohort 1.**

Related to Figure 1A; Figure 1H; Figure 3, B-E; Supplemental Figure 1G, Supplemental Figure 3, G and H;  
Supplemental Figure 4, F and G; Supplemental Figure 5, C and D

| Characteristic                          | Term        | Preterm     | Adult                  |
|-----------------------------------------|-------------|-------------|------------------------|
| <b>Demographics</b>                     | n=17        | n=26        | n=19                   |
| <b>Gender (M:F)</b>                     | 8:9         | 12:14       | 9:10                   |
| <b>Gestational age, mean (SD), wk</b>   | 37.85±0.74  | 30.61±2.57  | 36.05±5.91 (Age: year) |
| <b>Birth weight, mean (SD), kg</b>      | 3.09±0.55   | 1.38±0.47   |                        |
| <b>Cesarean (%)</b>                     | 10 (58.82%) | 18 (69.23%) |                        |
| <b>Indications for preterm delivery</b> |             |             |                        |
| <b>Maternal heart failure</b>           |             | 3 (11.54%)  |                        |
| <b>Premature rupture of membranes</b>   |             | 6 (23.08%)  |                        |
| <b>Preeclampsia</b>                     |             | 7 (26.92%)  |                        |
| <b>Fetal distress</b>                   |             | 3 (11.54%)  |                        |
| <b>Placental previa/abruption</b>       |             | 4 (15.38%)  |                        |
| <b>Multiple pregnancies</b>             |             | 5 (19.23%)  |                        |
| <b>Others</b>                           |             | 3 (11.54 %) |                        |
| <b>Diseases</b>                         |             |             |                        |
| <b>Respiratory distress syndrome</b>    | 0 (0%)      | 10 (38.46%) |                        |
| <b>Sepsis</b>                           | 1 (5.88%)   | 13 (50%)    |                        |
| <b>Necrotizing enterocolitis</b>        | 4 (23.53%)  | 14 (53.85%) |                        |
| <b>Pneumonia</b>                        | 1 (5.88%)   | 1 (3.85%)   |                        |

**Supplemental Table 2. Clinical characteristics of Cohort 2.**

Related to Figure 1, C-G; Supplemental Figure 1, B-E; Supplemental Figure 3, A-D

| Characteristic                        | Inflammation group | Non-inflammation group |
|---------------------------------------|--------------------|------------------------|
| <b>Demographics</b>                   | n=42               | n=41                   |
| <b>Gender (M:F)</b>                   | 30:12              | 30:11                  |
| <b>Gestational age, mean (SD), wk</b> | 34.33±5.03         | 36.38±2.96             |
| <b>Birth weight, mean (SD), kg</b>    | 2.3±1.09           | 2.61±0.84              |
| <b>Cesarean (%)</b>                   | 26 (61.9%)         | 27 (65.85%)            |
| <b>Diseases</b>                       |                    |                        |
| <b>Respiratory distress syndrome</b>  | 22 (52.38%)        | 14 (34.15%)            |
| <b>Sepsis</b>                         | 20 (47.62%)        | 0 (0%)                 |
| <b>Necrotizing enterocolitis</b>      | 2 (4.76%)          | 0 (0%)                 |
| <b>Pneumonia</b>                      | 8 (19.05%)         | 0 (0%)                 |
| <b>Urinary tract infection</b>        | 9 (21.43%)         | 0 (0%)                 |
| <b>Other inflammatory disorders</b>   | 10 (23.81%)        | 0 (0%)                 |

Plasma samples were prospectively collected from healthy neonates within 2 days of birth. The infants were divided into two groups based on the presence of subsequent inflammatory disorders within one month of follow-up: the inflammation group and non-inflammation group.

Supplemental Table 3. Antibodies.

| Antibodies                                             | Source                    | Identifier                        |
|--------------------------------------------------------|---------------------------|-----------------------------------|
| Anti-Mouse/human CD11b-FITC (clone M1/70)              | BioLegend                 | Cat# 101206; RRID: AB_312789      |
| Anti-Mouse/human CD11b-BV421 (clone M1/70)             | BioLegend                 | Cat# 101235; RRID: AB_10897942    |
| Anti-Mouse Ly6C-APC (clone HK1.4)                      | eBioscience               | Cat# 17-5932-82; RRID: AB_1724153 |
| Anti-Mouse Ly6C-PerCPCy5.5 (clone HK1.4)               | eBioscience               | Cat# 45-5932-82; RRID: AB_2723343 |
| Anti-Mouse Ly6G-PE (clone 1A8-Ly6g)                    | eBioscience               | Cat# 12-9668-82; RRID: AB_2572720 |
| Anti-Mouse Ly6G-PE-Cy7 (clone 1A8)                     | Biolegend                 | Cat# 127618; RRID: AB_1877261     |
| Anti-Mouse CD3-PE (clone 145-2C11)                     | eBioscience               | Cat# 12-0031-85; RRID: AB_465498  |
| Anti-Mouse CD45-APCCy7 (clone 30-F11)                  | BioLegend                 | Cat# 103116; RRID: AB_312981      |
| Anti-Mouse CD4-biotin (GK1.5)                          | BioLegend                 | Cat# 100404; RRID: AB_312689      |
| Anti-Mouse CD8-APCCy7 (clone 53-6.7)                   | BioLegend                 | Cat# 100714; RRID: AB_312753      |
| Anti-Mouse CD8-PE (53-6.7)                             | BioLegend                 | Cat# 100708; RRID: 312747         |
| Anti-Mouse-Hu/Mo Arginase 1-APC (clone A1exF5)         | Invitrogen                | Cat# 17-3697-82; RRID: AB_2734835 |
| Anti-Human CD14-PE-Cy7 (clone 61D3)                    | Invitrogen                | Cat# 25-0149-42; RRID: AB_1582276 |
| Anti-Human CD15-eFluor™ 450 (clone HI98)               | Invitrogen                | Cat# 48-0159-41; RRID: AB_2016589 |
| Anti-Human LOX-1-PE (15C4)                             | BioLegend                 | Cat# 358603; RRID: AB_2562181     |
| Anti-Human LOX-1-APC (15C4)                            | BioLegend                 | Cat# 358605; RRID: AB_2563473     |
| Anti-Mouse IL-17A-PE (TC11-18H10.1)                    | BioLegend                 | Cat# 506904; RRID_315464          |
| Anti-Mouse FoxP3-APC (FJK-16s)                         | Invitrogen                | Cat# 17-5773-82; RRID: AB_469457  |
| Histone H3K27ac antibody mAb (clone D5E4)              | Cell Signaling Technology | Cat# 8173S; RRID: AB_10949503     |
| Rabbit anti-ODC1 Polyclonal antibody                   | Protein Tech              | Cat# 28728-1-AP; RRID: AB_2881200 |
| Rabbit anti-DHPS Polyclonal antibody                   | Protein Tech              | Cat# 11184-1-AP; RRID: AB_2877751 |
| Rabbit anti-NFU1 Polyclonal antibody                   | Protein Tech              | Cat# 25598-1-AP; RRID: AB_2880151 |
| Rabbit anti-EIF5A Polyclonal antibody                  | Abmart                    | Cat# TU256449S                    |
| Rabbit anti-Hypusine Monoclonal antibody (clone Hpu24) | AntibodySystem            | Cat# RGK08101                     |
| Anti-Rabbit IgG H&L                                    | Vazyme                    | Cat# Ab207-01                     |
| PE-Cy7 Streptavidin                                    | Invitrogen                | Cat# 25-4317-82                   |
| Donkey anti-rabbit Alexa Flour 647                     | Invitrogen                | Cat# A-31573; RRID: AB_2536183    |

Supplemental Table 4. Reagents.

| Chemicals, peptides and recombinant proteins             | Source                   | Identifier       |
|----------------------------------------------------------|--------------------------|------------------|
| Alpha-difluoromethylornithine (DFMO)                     | MedChemExpress           | Cat# HY-B0744D   |
| GC7                                                      | MedChemExpress           | Cat# HY-108314A  |
| C646                                                     | MedChemExpress           | Cat# HY-13823    |
| 5-Tetradecyloxy-2-furonic acid (TOFA)                    | MedChemExpress           | Cat# HY-101068   |
| Spermidine                                               | Sigma-Aldrich            | Cat# S2626       |
| Acetate                                                  | Sigma-Aldrich            | Cat# S8750       |
| Sodium citrate                                           | Sigma-Aldrich            | Cat# 71498       |
| Diethyl succinate                                        | Sigma-Aldrich            | Cat# 112402      |
| Tetramethylrhodamine, methyl ester (TMRM)                | Thermo Fisher Scientific | Cat# T668        |
| MitoTracker™ Green FM                                    | Invitrogen               | Cat# M46750      |
| Oligomycin                                               | MedChemExpress           | Cat# HY-N6782    |
| Rotenone                                                 | MedChemExpress           | Cat# HY-B1756    |
| Antimycin A                                              | MKBio                    | Cat# MS0070      |
| Fluorocarbonyl cyanide phenylhydrazone (FCCP)            | Sigma-Aldrich            | Cat# C2920       |
| Polybrene                                                | YEASEN                   | Cat# 40804ES76   |
| LIVE/DEAD Fixable Dead Cell Stain Kits                   | Thermo Fisher Scientific | Cat# L34966      |
| 4', 6-Diamidino-Phenylindole (DAPI)                      | Thermo Fisher Scientific | Cat# 62248       |
| CellTrace™ CFSE                                          | Invitrogen               | Cat# C34554      |
| Dithiothreitol (DTT)                                     | Solarbio                 | Cat# D1070       |
| Lipopolysaccharide (LPS)                                 | Sigma-Aldrich            | Cat# L2880       |
| Lymphoprep™                                              | Serumwerk Bernburg AG    | Cat# 00319       |
| SIINFEKL                                                 | Sigma-Aldrich            | Cat# S7951       |
| Hyperactive Universal CUT&Tag Assay Kit for Illumina Pro | Vazyme                   | Cat# TD904       |
| TruePrep index Kit V2 for Illumina                       | Vazyme                   | Cat# TD202-00    |
| Recombinant murine GM-CSF                                | Peprotech                | Cat# 315-03-100  |
| Recombinant human GM-CSF                                 | Peprotech                | Cat# 300-03      |
| Mouse PGE2 ELISA kit                                     | MEIMIAN                  | Cat# MM-0062M2   |
| Seahorse XFe24 FluxPak                                   | Agilent                  | Cat# 102342-100  |
| Human putrescine ELISA kit                               | MEIMIAN                  | Cat# MM-92784201 |
| Human spermidine ELISA kit                               | MLbio                    | Cat# ml-E4461    |
| Human spermine ELISA kit                                 | MLbio                    | Cat# ml-E5544    |
| Mouse spermidine ELISA kit                               | MLbio                    | Cat# YJ580071    |
| Acetyl Coenzyme A ELISA kit                              | Elabscience              | Cat# E-EL-0125   |
| Human I-FABP2 ELISA kit                                  | Boster                   | Cat# EK1410      |

Supplemental Table 5. RT-qPCR primers sequences.

| Gene           | Forward primer              | Reverse primer            | Species |
|----------------|-----------------------------|---------------------------|---------|
| <i>S100a8</i>  | GGAAATCACCATGCCCTCT         | TTTATCACCATCGCAAGGAAC     | Mouse   |
| <i>S100a9</i>  | AATGGTGGAAGCACAGTTGG        | GCTGATTGTCCTGGTTTGTG      | Mouse   |
| <i>Ptges</i>   | GCACACTGCTGGTCATCAAG        | ACGTTTCAGCGCATCCTC        | Mouse   |
| <i>Arg1</i>    | ATTATCGGAGCGCCTTTCTC        | ACAGACCGTGGGTTCCTCAC      | Mouse   |
| <i>Nfu1</i>    | AGGCGGTTCTGTCATGTAGC        | TTTGGGGTGCTTGTGTTTGA      | Mouse   |
| <i>Il1b</i>    | GCAACTGTTCTGAACTCAACT       | ATCTTTTGGGGTCCGTCAACT     | Mouse   |
| <i>Il10</i>    | GCTCTTACTGACTGGCATGAG       | CGCAGCTCTAGGAGCATGTG      | Mouse   |
| <i>Tnfa</i>    | ATCGGTCCCCAAAGGGATGAGAAGTTC | GACGTGGGCTACAGGCTTGTCACTC | Mouse   |
| <i>16srRNA</i> | GTGSTGCAYGYTGTCGTCA         | ACGTCRTCCMCACCTTCCTC      | Mouse   |
| <i>S100A8</i>  | ATGCCGTCTACAGGGATGAC        | ACTGAGGACACTCGGTCTCTA     | Human   |
| <i>S100A9</i>  | GGTCATAGAACACATCATGGAGG     | GGCCTGGCTTATGGTGGTG       | Human   |
| <i>PTGES</i>   | TCCTAACCCCTTTGTGCGCTG       | CGCTTCCCAGAGGATCTGC       | Human   |
| <i>ARG1</i>    | GTGGAAACTTGCATGGACAAC       | AATCCTGGCACATCGGGAATC     | Human   |
